# Supplementary material for: First Viruses Infecting the Marine Diatom Guinardia delicatula
Source: PubMed Central journal article supplement (PMC6334475; doi:10.3389/fmicb.2018.03235), 2019-01-09
Supplement: Image_1.pdf [file Image_1.pdf]

|             | 1                                                            | 10                                                  | 20 | 30 | 40 | 50 | 60 |
|-------------|--------------------------------------------------------------|-----------------------------------------------------|----|----|----|----|----|
| GdeLRNAV-01 | CATCAATGCT                                                   | GCTTTTGCCGCTTTAATAGAAATTGCGGAAAAATGTGGCAGATATAACCAA |    |    |    |    |    |
| GdeLRNAV-02 | CATCAATGCT                                                   | GCTTTTGCCGCTTTAATAGAAATTGCGGAAAAATGTGGCAGATATAACCAA |    |    |    |    |    |
| GdeLRNAV-03 | CATCAATGCT                                                   | GCTTTTGCCGCTTTAATAGAAATTGCGGAAAAATGTGGCAGATATAACCAA |    |    |    |    |    |
| GdeLRNAV-04 | CATCAATGCT                                                   | GCTTTTGCCGCTTTAATAGAAATTGCGGAAAAATGTGGCAGATATAACCAA |    |    |    |    |    |
| GdeLRNAV-01 | TGATGATCTTACGATTATGAGAGGTATTGCAACAGAAATTGCTTATTCATGCGTAGCTTA |                                                     |    |    |    |    |    |
| GdeLRNAV-02 | TGATGATCTTACGATTATGAGAGGTATTGCAACAGAAATTGCTTATTCATGCGTAGCTTA |                                                     |    |    |    |    |    |
| GdeLRNAV-03 | TGATGATCTTACGATTATGAGAGGTATTGCAACAGAAATTGCTTATTCATGCGTAGCTTA |                                                     |    |    |    |    |    |
| GdeLRNAV-04 | TGATGATCTTACGATTATGAGAGGTATTGCAACAGAAATTGCTTATTCATGCGTAGCTTA |                                                     |    |    |    |    |    |
| GdeLRNAV-01 | TAATGGAGATATTATTATCCATAAAGGATCAAATCCATCAGGACAAAATTTAACGGTATA |                                                     |    |    |    |    |    |
| GdeLRNAV-02 | TAATGGAGATATTATTATCCATAAAGGATCAAATCCATCAGGACAAAATTTAACGGTATA |                                                     |    |    |    |    |    |
| GdeLRNAV-03 | TAATGGAGATATTATTATCCATAAAGGATCAAATCCATCAGGACAAAATTTAACGGTATA |                                                     |    |    |    |    |    |
| GdeLRNAV-04 | TAATGGAGATATTATTATCCATAAAGGATCAAATCCATCAGGACAAAATTTAACGGTATA |                                                     |    |    |    |    |    |
| GdeLRNAV-01 | TATTAAGTGT                                                   | TCGTTAATTCTTTGCTATTAAGATGTGCATATTTTACCTTTGGCCTAA    |    |    |    |    |    |
| GdeLRNAV-02 | TATTAAGTGT                                                   | TCGTTAATTCTTTGCTATTAAGATGTGCATATTTTACCTTTGGCCTAA    |    |    |    |    |    |
| GdeLRNAV-03 | TATTAAGTGT                                                   | TCGTTAATTCTTTGCTATTAAGATGTGCATATTTTACCTTTGGCCTAA    |    |    |    |    |    |
| GdeLRNAV-04 | TATTAAGTGT                                                   | TCGTTAATTCTTTGCTATTAAGATGTGCATATTTTACCTTTGGCCTAA    |    |    |    |    |    |
| GdeLRNAV-01 | ACACCTAGGTCAGCCAAAACCTTTTCGTGAGGTTTGTGCTATTATGACTTATGGTGATGA |                                                     |    |    |    |    |    |
| GdeLRNAV-02 | ACACCTAGGTCAGCCAAAACCTTTTCGTGAGGTTTGTGCTATTATGACTTATGGTGATGA |                                                     |    |    |    |    |    |
| GdeLRNAV-03 | ACACCTAGGTCAGCCAAAACCTTTTCGTGAGGTTTGTGCTATTATGACTTATGGTGATGA |                                                     |    |    |    |    |    |
| GdeLRNAV-04 | ACACCTAGGTCAGCCAAAACCTTTTCGTGAGGTTTGTGCTATTATGACTTATGGTGATGA |                                                     |    |    |    |    |    |
| GdeLRNAV-01 | TGTTAAAGGTTCTGTAAAGGA                                        | AAGGCTATGATTGGTTTAATCATATTTTATGCTGATTT              |    |    |    |    |    |
| GdeLRNAV-02 | TGTTAAAGGTTCTGTAAAGGA                                        | AAGGCTATGATTGGTTTAATCATATTTTATGCTGATTT              |    |    |    |    |    |
| GdeLRNAV-03 | TGTTAAAGGTTCTGTAAAGGA                                        | AAGGCTATGATTGGTTTAATCATATTTTATGCTGATTT              |    |    |    |    |    |
| GdeLRNAV-04 | TGTTAAAGGTTCTGTAAAGGA                                        | AAGGCTATGATTGGTTTAATCATATTTTATGCTGATTT              |    |    |    |    |    |
| GdeLRNAV-01 | CTTAAGAGAACGTGATATGGT                                        | TTTACTATGCCAGATAAAGAATCTGAACCTACCCATA               |    |    |    |    |    |
| GdeLRNAV-02 | CTTAAGAGAACGTGATATGGT                                        | TTTACTATGCCAGATAAAGAATCTGAACCTACCCATA               |    |    |    |    |    |
| GdeLRNAV-03 | CTTAAGAGAACGTGATATGGT                                        | TTTACTATGCCAGATAAAGAATCTGAACCTACCCATA               |    |    |    |    |    |
| GdeLRNAV-04 | CTTAAGAGAACGTGATATGGT                                        | TTTACTATGCCAGATAAAGAATCTGAACCTACCCATA               |    |    |    |    |    |
| GdeLRNAV-01 | CATGAATGATCTCGAAGCTGATTTTTTTGAAGCGTGAGAATATATTTAATGAGGATACT  |                                                     |    |    |    |    |    |
| GdeLRNAV-02 | CATGAATGATCTCGAAGCTGATTTTTTTGAAGCGTGAGAATATATTTAATGAGGATACT  |                                                     |    |    |    |    |    |
| GdeLRNAV-03 | CATGAATGATCTCGAAGCTGATTTTTTTGAAGCGTGAGAATATATTTAATGAGGATACT  |                                                     |    |    |    |    |    |
| GdeLRNAV-04 | CATGAATGATCTCGAAGCTGATTTTTTTGAAGCGTGAGAATATATTTAATGAGGATACT  |                                                     |    |    |    |    |    |

Figure S1. Nucleotide alignment of the partial sequences of the RNA-dependent RNA polymerase of GdeLRNAV viruses. Differences between sequences are enclosed in a red frame. RdRp sequences were aligned using MAFFT on Geneious 9.1.3.
